# Supplementary material for: The Antagonizing Role of Heme in the Antimalarial Function of Artemisinin: Elevating Intracellular Free Heme Negatively Impacts Artemisinin Activity in Plasmodium falciparum
Source: MDPI journal article supplement (doi:10.3390/molecules27061755), 2022-03-08
Supplement: s1 [file s1]

## Supplementary Information

# The Antagonizing Role of Heme in the Antimalarial Function of Artemisinin: Elevating Intracellular Free Heme Negatively Impacts Artemisinin Activity in *Plasmodium falciparum*

Pan Zhu <sup>1</sup> and Bing Zhou <sup>1,2,\*</sup>

<sup>1</sup> State Key Laboratory of Membrane Biology, School of Life Sciences, Tsinghua University, Beijing 100084, China

<sup>2</sup> Shenzhen Institute of Synthetic Biology, Shenzhen Institute of Advanced Technology, Chinese Academy of Sciences, Shenzhen 518055, China

\* Correspondence: bing.zhou@siat.ac.cn

## Contents

Supplementary Tables S1 and S2

Supplementary Figures S1–S6

## Supplementary Tables

Supplementary Table S1. EC<sub>50</sub> values of artemisinin with heme related chemicals.

Table S1A. Antimalarial effectiveness of artemisinins was reduced by exogenous hemin.

| Sample    |     |             | EC <sub>50</sub> Value (nM) | p-Value (t-test) |
|-----------|-----|-------------|-----------------------------|------------------|
| Figure 1A | ART | Control     | 22.20 ± 1.13                | /                |
|           |     | 5 µM Hemin  | 90.59 ± 6.70                | <0.0001 (***)    |
|           |     | 10 µM Hemin | 156.95 ± 10.35              | <0.0001 (***)    |
| Figure 1D | DHA | Control     | 12.52 ± 0.35                | /                |
|           |     | 5 µM Hemin  | 40.92 ± 1.58                | <0.0001 (***)    |
|           |     | 10 µM Hemin | 77.48 ± 3.91                | <0.0001 (***)    |

Table S1B. Hemozoin inhibitor-14c decreased sensitivity of artemisinin.

| Sample    |     |          | EC <sub>50</sub> Value (nM) | p-Value (t-test) |
|-----------|-----|----------|-----------------------------|------------------|
| Figure 2B | ART | Control  | 18.29 ± 0.26                | /                |
|           |     | 3 µM 14c | 24.87 ± 0.68                | <0.0001 (***)    |
|           |     | 5 µM 14c | 29.34 ± 1.82                | 0.0005 (***)     |
| Figure 2C | DHA | Control  | 8.86 ± 0.57                 | /                |
|           |     | 3 µM 14c | 18.41 ± 2.46                | 0.0028 (**)      |
|           |     | 5 µM 14c | 30.92 ± 6.45                | 0.0041 (**)      |
| Figure 2E | ART | Control  | 17.89 ± 0.52                | /                |
|           |     | 2 µM 14d | 16.84 ± 0.64                | 0.0921 (ns)      |
|           |     | 4 µM 14d | 16.71 ± 0.83                | 0.1052 (ns)      |

Table S1C. HO neutralized 14c's effect on artemisinin sensitivity.

| Sample                  |         |         | EC <sub>50</sub> Value | <i>p</i> -Value ( <i>t</i> -test) |
|-------------------------|---------|---------|------------------------|-----------------------------------|
| Figure 3B               | ART     | 3D7     | 25.95 ± 1.45 nM        | /                                 |
|                         |         | HO      | 25.83 ± 1.30 nM        | 0.9202 (ns)                       |
| Supplementary Figure 4A |         | EGFP    | 27.03 ± 1.83 nM        | 0.4528 (ns)                       |
| Figure 3D               | 14c     | 3D7     | 2.42 ± 0.07 μM         | /                                 |
|                         |         | HO      | 8.41 ± 1.84 μM         | 0.0049 (**)                       |
| Supplementary Figure 4B |         | EGFP    | 2.38 ± 0.24 μM         | 0.7954 (ns)                       |
| Figure 3F               | HO(ART) | Control | 18.37 ± 0.76 nM        | /                                 |
|                         |         | 14c     | 17.47 ± 1.03 nM        | 0.2902 (ns)                       |

**Table S1D.** Heme analogues-ZnPPIX/ZnMP increased EC<sub>50</sub> of artemisinin.

|           | Sample       | EC <sub>50</sub> Value (nM) | <i>p</i> -Value ( <i>t</i> -test) |
|-----------|--------------|-----------------------------|-----------------------------------|
| Figure 4B | Control      | 25.61 ± 2.32                | /                                 |
|           | 5 µM ZnPPIX  | 40.96 ± 2.50                | 0.0015 (**)                       |
|           | 10 µM ZnPPIX | 69.02 ± 6.96                | 0.0005 (***)                      |
| Figure 4D | Control      | 25.61 ± 2.32                | /                                 |
|           | 5 µM ZnMP    | 39.49 ± 2.88                | 0.0029 (**)                       |
|           | 10 µM ZnMP   | 79.27 ± 5.29                | <0.0001 (***)                     |

**Table S1E.** Inhibitors of heme biosynthesis and hemoglobin degradation had little effect on the efficacy of artemisinin.

|           | Sample                            | EC <sub>50</sub> Value (nM) | <i>p</i> -Value ( <i>t</i> -test) |
|-----------|-----------------------------------|-----------------------------|-----------------------------------|
| Figure 5C | Control (H <sub>2</sub> O)        | 23.32 ± 1.28                | /                                 |
|           | 50 µM SA                          | 22.96 ± 1.16                | 0.7324 (ns)                       |
|           | 100 µM SA                         | 21.94 ± 1.17                | 0.2402 (ns)                       |
| Figure 5F | Control (DMSO)                    | 26.97 ± 1.10                | /                                 |
|           | 5 µM E64                          | 25.00 ± 1.37                | 0.1241 (ns)                       |
|           | 10 µM E64                         | 25.32 ± 1.08                | 0.1284 (ns)                       |
|           | 80 µM Pepstatin A                 | 24.48 ± 1.18                | 0.0556 (ns)                       |
|           | 160 µM Pepstatin A                | 27.87 ± 4.22                | 0.7388 (ns)                       |
| Figure 5H | Control (DMSO + H <sub>2</sub> O) | 31.22 ± 5.56                | /                                 |
|           | E64 + Pepstatin A                 | 22.68 ± 3.22                | 0.0827 (ns)                       |
|           | E64 + SA                          | 24.56 ± 3.34                | 0.1503 (ns)                       |
|           | Pepstatin A + SA                  | 25.26 ± 1.62                | 0.1491 (ns)                       |
|           | E64 + Pepstatin A + SA            | 22.59 ± 3.22                | 0.0806 (ns)                       |

## Supplementary Table S2. EC<sub>50</sub> values of some antimalarials with heme related chemicals.

**Table S2A.** Elevating heme level could not affect atovaquone action.

|           | Sample              | EC <sub>50</sub> Value (nM) | <i>p</i> -Value ( <i>t</i> -test) |
|-----------|---------------------|-----------------------------|-----------------------------------|
| Figure 6A | Control (0.1M NaOH) | 0.61 ± 0.08                 | /                                 |
|           | 5 µM Hemin          | 0.66 ± 0.09                 | 0.5118 (ns)                       |
|           | 10 µM Hemin         | 0.61 ± 0.09                 | >0.9999 (ns)                      |
| Figure 6B | Control (DMSO)      | 0.74 ± 0.13                 | /                                 |
|           | 5 µM ZnMP           | 0.60 ± 0.07                 | 0.1759 (ns)                       |
|           | 10 µM ZnMP          | 0.60 ± 0.08                 | 0.1874 (ns)                       |
| Figure 6C | Control (DMSO)      | 0.74 ± 0.13                 | /                                 |
|           | 5 µM ZnPPiX         | 0.65 ± 0.08                 | 0.3649 (ns)                       |
|           | 10 µM ZnPPiX        | 0.68 ± 0.08                 | 0.5334 (ns)                       |
| Figure 6D | Control (DMSO)      | 0.74 ± 0.13                 | /                                 |
|           | 3 µM 14c            | 0.75 ± 0.10                 | 0.9210 (ns)                       |
|           | 5 µM 14c            | 0.65 ± 0.10                 | 0.3957 (ns)                       |

**Table S2B.** Hemin exerted little effect on some other antimalarials.

|           | Sample        | Control           | Hemin             | <i>p</i> -Value ( <i>t</i> -test) |
|-----------|---------------|-------------------|-------------------|-----------------------------------|
| Figure 6E | Artemisinin   | 20.57 ± 1.22 nM   | >200 nM           | /                                 |
| Figure 6F | Quinine       | 115.05 ± 11.55 nM | 130.35 ± 14.15 nM | 0.2180 (ns)                       |
| Figure 6G | Mefloquine    | 44.21 ± 3.44 nM   | 38.66 ± 2.43 nM   | 0.0846 (ns)                       |
| Figure 6H | Proguanil     | 22.41 ± 1.55 µM   | 22.27 ± 1.4 µM    | 0.9132 (ns)                       |
| Figure 6I | Pyrimethamine | 85.52 ± 18.59 nM  | 75.35 ± 14.88 nM  | 0.5045 (ns)                       |

## Supplementary Figures &amp; Legends

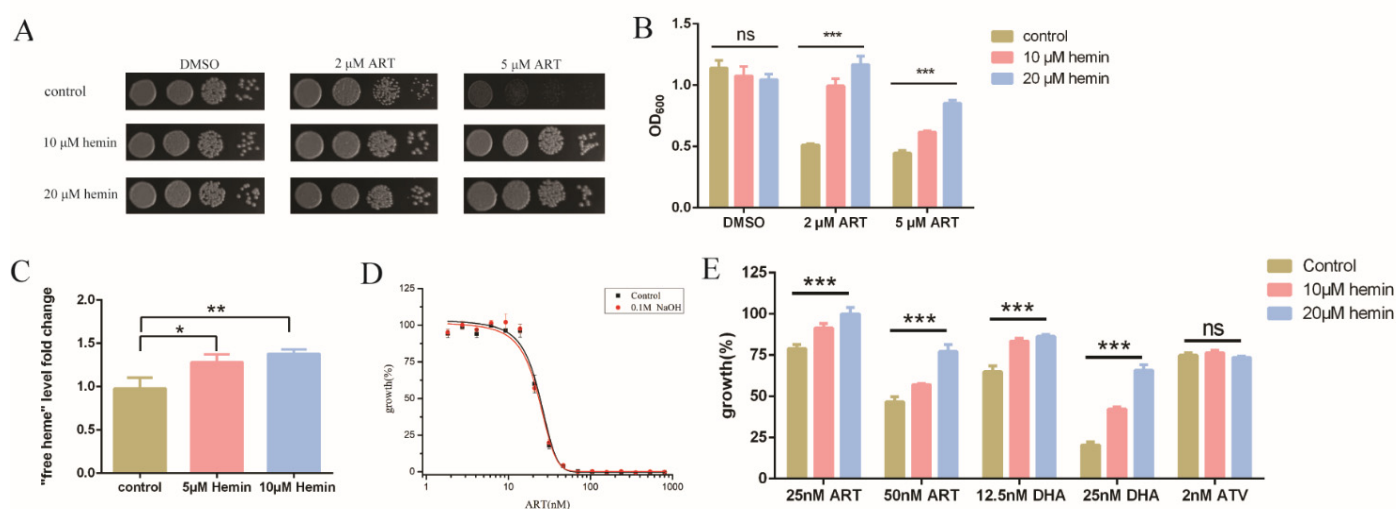

**Figure S1. Heme antagonized artemisinins' action.** Sensitivity of artemisinin in *Saccharomyces cerevisiae* was decreased with the addition of hemin on agar plates (A) and in liquid (B). For liquid assays, data are mean  $\pm$  SD of four independent experiments. Comparison was performed by the analysis of variance (ANOVA), \*\*\*  $p < 0.0005$ , ns: not significant ( $p > 0.05$ ). (C) Exogenous hemin enhanced "free heme" level in parasites. Data are mean  $\pm$  SD of three independent experiments, comparison was performed by the unpaired t-test, \*  $p < 0.05$ , \*\*  $p < 0.005$ . (D) 0.1 M NaOH had little effect on artemisinin action. Data are mean  $\pm$  SD of three independent experiments,  $p = 0.8547$  (not significant). (E) Pre-treated with hemin decreased ARTs efficacy. Prior treatment of parasites with hemin for 24 h followed by washing, short pulse assay at middle ring stage was used for artemisinins sensitivity measurement, atovaquone (ATV) as a control. Data are mean  $\pm$  SD of three independent experiments. Comparison was performed by the analysis of variance (ANOVA), \*\*\*  $p < 0.0005$ , ns: not significant ( $p > 0.05$ ).

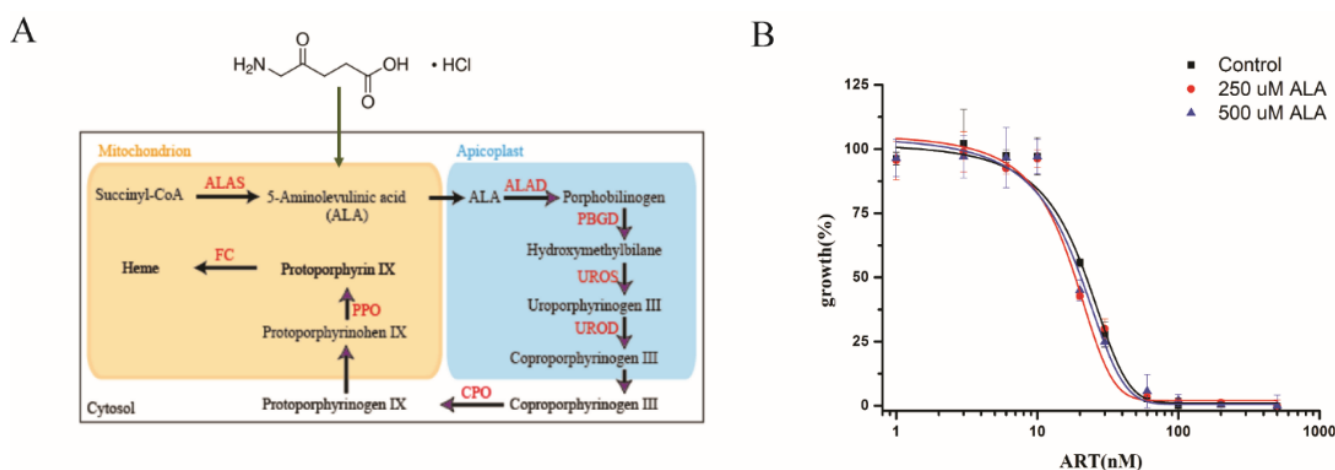

**Figure S2. ALA did not affect artemisinin potency.** (A) ALA is a precursor of heme biosynthesis. (B) Sensitivity of artemisinin with ALA had no significant change compared with H<sub>2</sub>O. EC<sub>50</sub> values were 20.02  $\pm$  0.22 nM/19.83  $\pm$  0.24 nM/19.87  $\pm$  0.22 nM in H<sub>2</sub>O/250 μM ALA/500 μM ALA. Data are mean  $\pm$  SD of three independent experiments,  $p > 0.05$  (not significant).

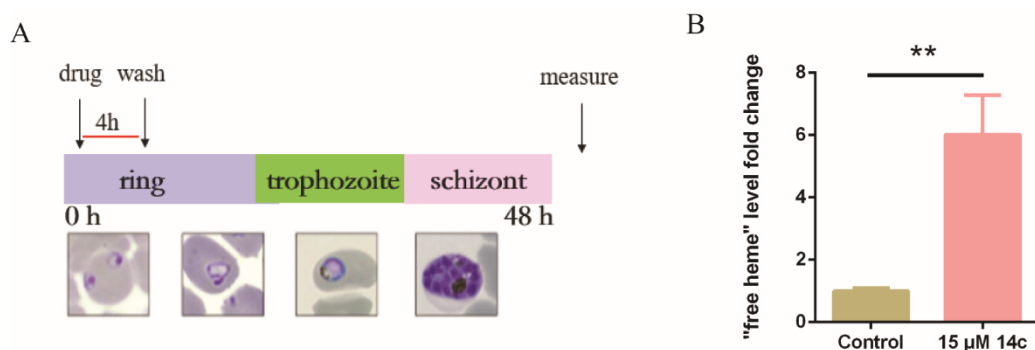

**Figure S3. Short pulse assay of 14c.** (A) A schematic representation of the short pulse assay. (B) The free heme level was enhanced with 15  $\mu$ M 14C after 4 h incubation. Data are mean  $\pm$  SD of three independent experiments, \*\*  $p < 0.005$ .

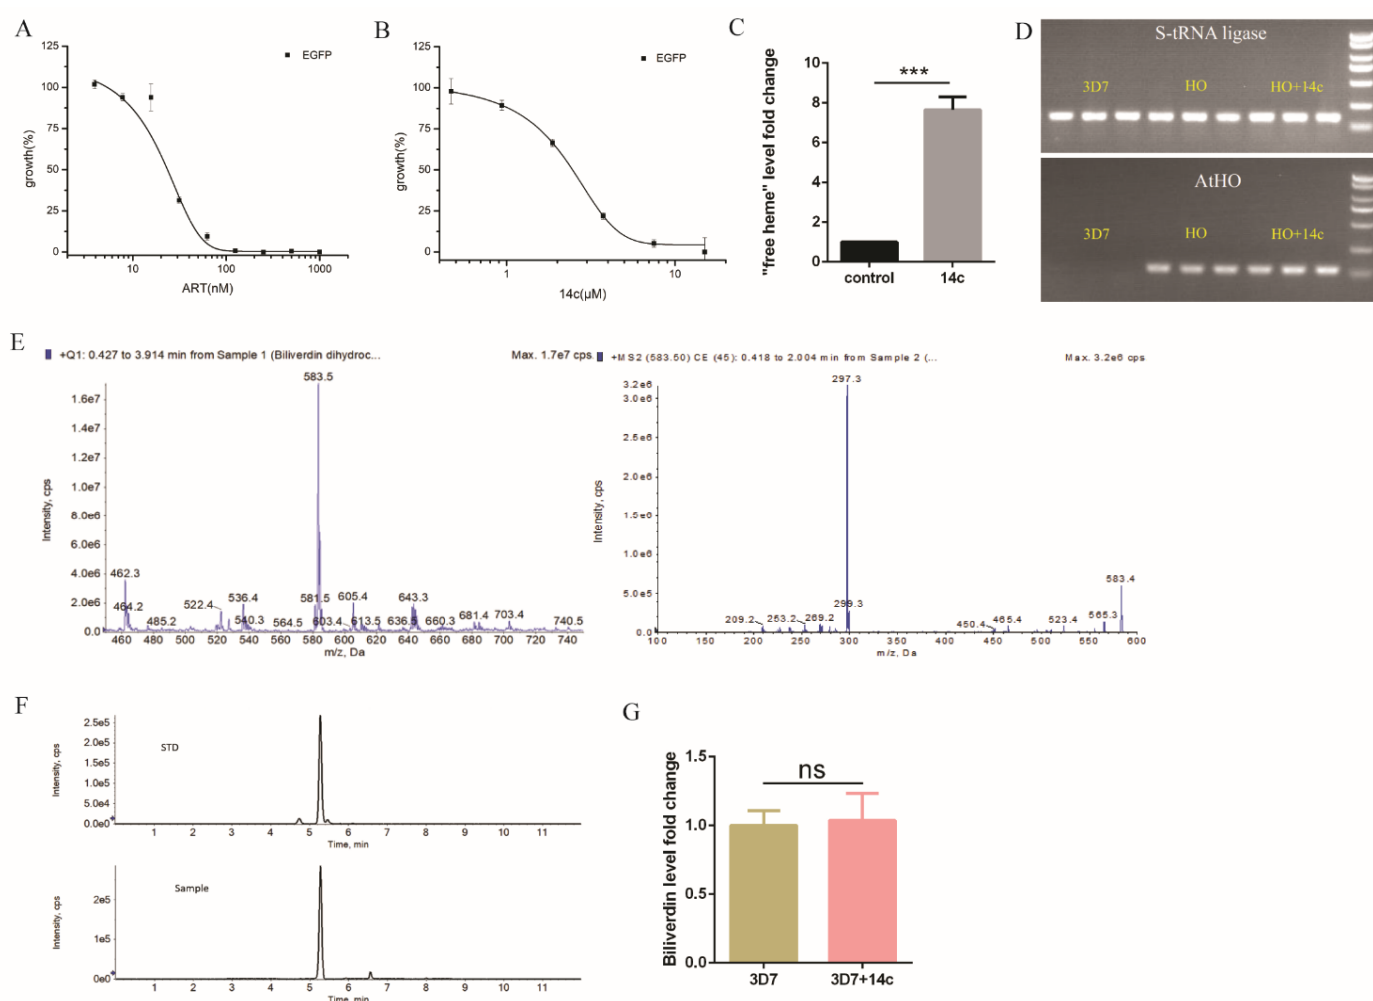

**Figure S4. HO was functional in the transgenic parasite.** HO gene was introduced to the parasites. EGFP expression strain was used as a control. (A) and (B) are respectively sensitivity to artemisinin (A) and to 14c (B) of the EGFP expression strain. EC<sub>50</sub> values are shown in Supplementary Table S1C. (C) "free heme" level was enhanced by 14c in the EGFP expression strain. Data are mean  $\pm$  SD of three independent experiments. \*\*\*  $p < 0.0005$ . (D) HO expression of the transfected clones was confirmed by RT-qPCR, with serine-tRNA ligase gene as the control. (E) Expanded y axis views of the peaks of biliverdin standard sample detected by LS-MS/MS. (F) Comparison of standard (STD) sample and experimental sample. (G) Biliverdin level in 3D7 infected RBC had little change with 14c. Data are mean  $\pm$  SD of four independent experiments. ns: not significant ( $p > 0.05$ ).

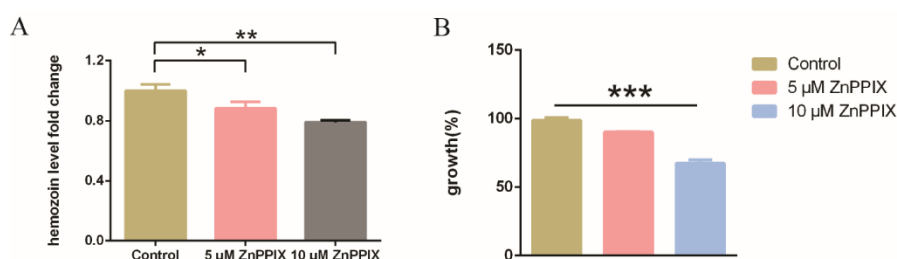

**Figure S5. ZnPPIX had effect on hemozoin formation and parasite growth.** (A) ZnPPIX reduced hemozoin level in parasites. Data are mean  $\pm$  SD of three independent experiments, \*  $p < 0.05$ , \*\*  $p < 0.005$ . (B) ZnPPIX could inhibit the growth of *p. falciparum*. The growth of parasites was measured after 72 h with ZnPPIX. Data are mean  $\pm$  SD of three independent experiments, comparison was performed by the analysis of variance (ANOVA), \*\*\*  $p < 0.0005$ .

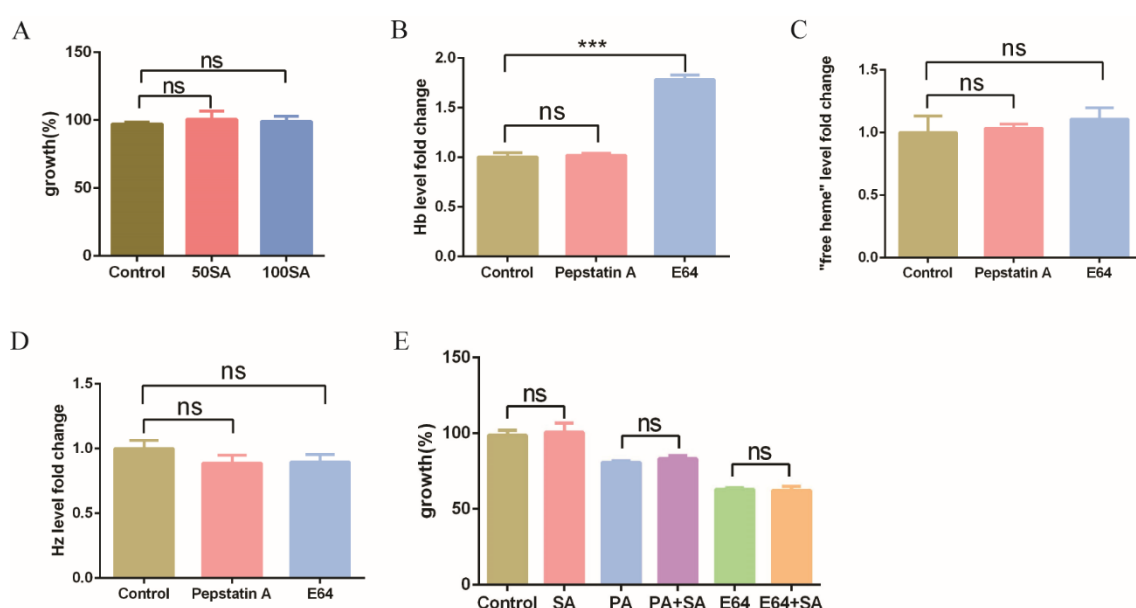

**Figure S6. Inhibitors of heme related pathway had little effect on parasite growth or free heme level.** (A) 50  $\mu$ M or 100  $\mu$ M SA had no toxic effect on parasites. The growth of parasites was measured after 72 h with SA. Data are mean  $\pm$  SD of three independent experiments, ns: not significant ( $p > 0.05$ ). E64 inhibited heme degradation but had little effect on "free heme" level and hemozoin level. (B) Hemoglobin level in parasite in the presence of inhibitors-E64 and Pepstatin A. "free heme" level and hemozoin level with E64 and Pepstatin A are shown in (C) and (D), respectively. Data are mean  $\pm$  SD of three independent experiments, ns: not significant ( $p > 0.05$ ), \*\*\*  $p < 0.0005$ . (E) SA had no interaction with E64 or Pepstatin A. The growth of parasites was measured after 72 h with heme related inhibitors. Data are mean  $\pm$  SD of three independent experiments, ns: not significant ( $p > 0.05$ ).
